# Supplementary material
Source: PubMed Central journal article supplement (PMC9744851)
Supplement: 41467_2022_35225_MOESM1_ESM.pdf [file 41467_2022_35225_MOESM1_ESM.pdf]

## **Supplementary Information**

### **Ocular tropism of SARS-CoV-2 in animal models with retinal inflammation via neuronal invasion following intranasal inoculation**

Jeong et al.

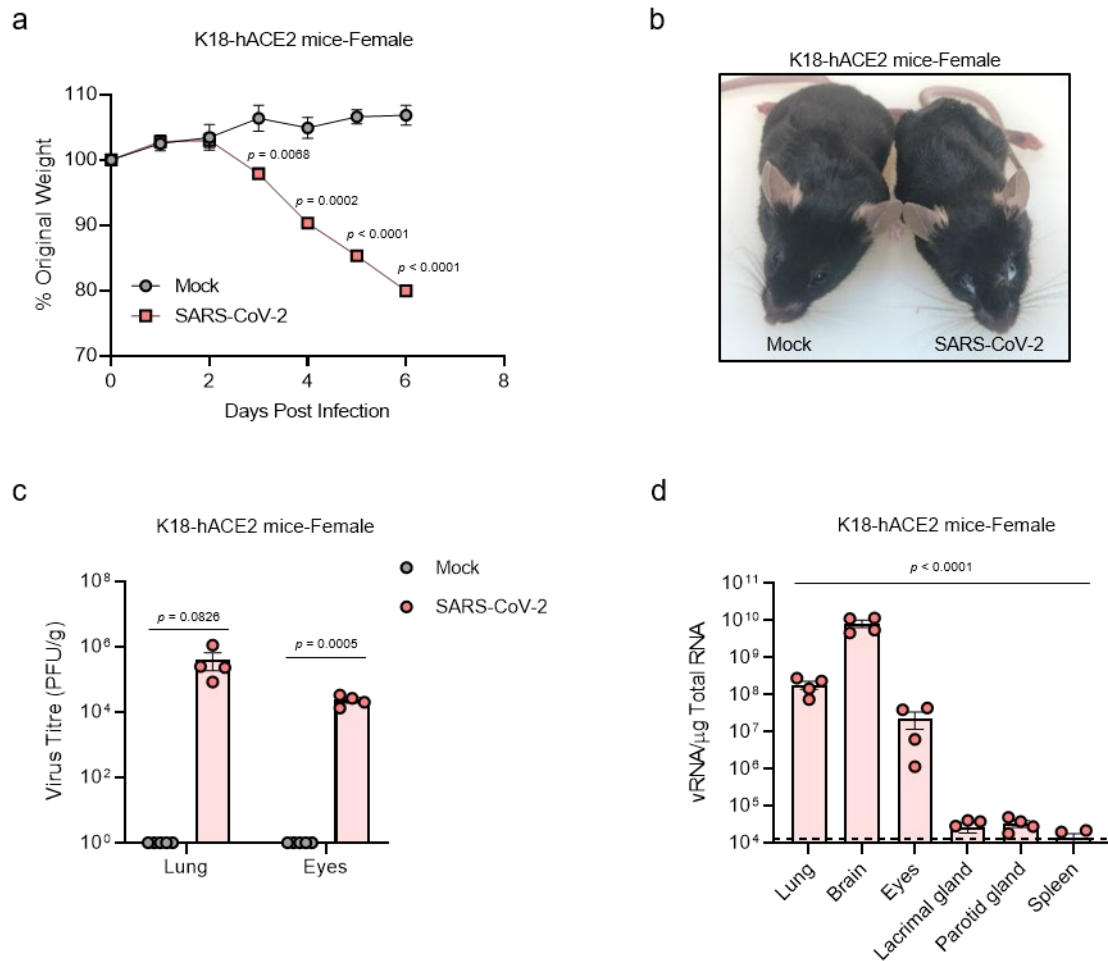

**Supplementary Fig. 1. Clinical features and virus titres in the eyes of SARS-CoV-2-infected female mice.** Eight-week-old female K18-hACE2 mice were intranasally mock-infected or infected with 10<sup>4</sup> PFU of SARS-CoV-2 (*n* = 4 for mock-infected and infected mice, respectively; mock, grey; SARS-CoV-2, red). **a** Body weight changes shown as percentage of starting weight at the indicated dpi. **b** Representative image of tearing and eye discharge in SARS-CoV-2-infected female mice at 6 dpi (right) compared to that in mock-infected female mice (left). **c** Viral load in the lungs and eyes, including appendages, was analysed using the plaque assay at 6 dpi. **d** Viral RNA levels in the lungs, brain, eyes, including appendages, lacrimal gland, parotid gland, spleen, and colon were assessed using RT-qPCR at 6 dpi. Viral RNA copies were cut-off at 10<sup>4</sup> copies/μg. A dashed line indicates the viral RNA levels of spleen as the limit of detection. Symbols represent means ± SEM. Statistically significant differences between the groups were determined using multiple two-tailed t-tests (**a**), unpaired two-

tailed t-test (**c**), or one-way ANOVA (**d**). SARS-CoV-2: severe acute respiratory syndrome coronavirus 2; PFU: plaque-forming unit; dpi: days post-infection

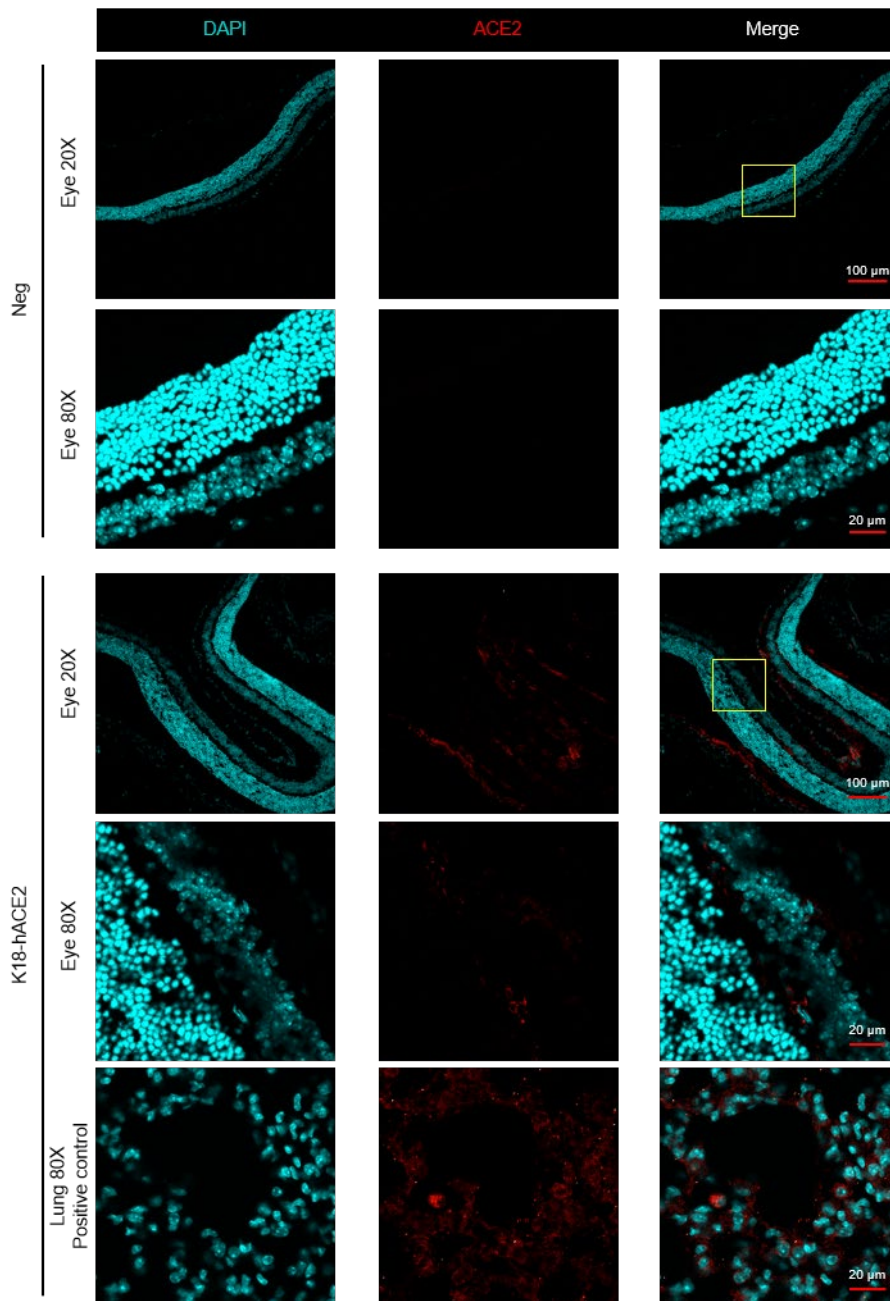

**Supplementary Fig. 2.** Immunofluorescence staining for hACE2 in the eyes of K18-hACE2 mice. Confocal microscopy of 10 μm cryosections of the eye of C57BL/6 (Neg) or K18-hACE2 mice. Eye and lung tissues were collected and processed for immunofluorescence staining of hACE2. Lung tissue was used as the positive control. Images were acquired using the 10×, 20×, and 40× (with 2× zoom) objectives of a confocal microscope and are representative of  $n = 10$  samples. Scale bars in panel = 100 μm for 20× objective and 20 μm for 40× (with 2× zoom) objective. Data are representative of two independent experiments.

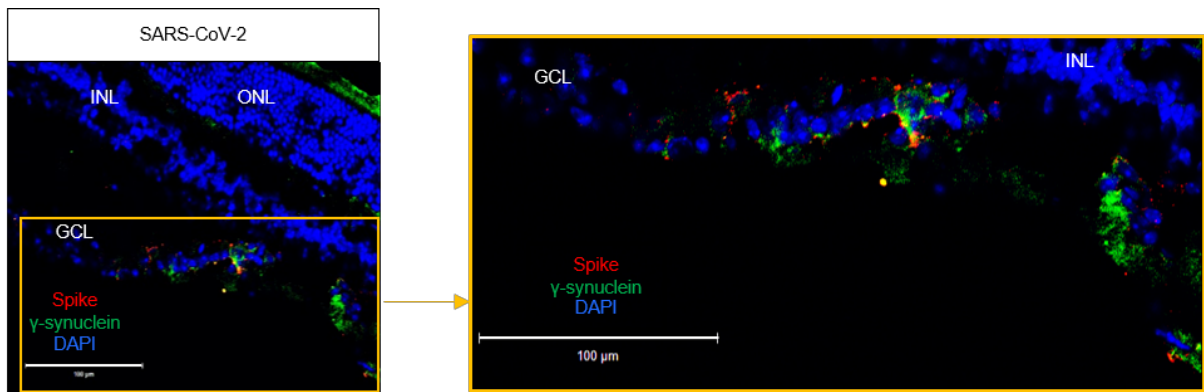

**Supplementary Fig. 3. Representative confocal images of fluorescently-stained retinal sections of IN-infected mice for viral spike (S) protein (red) and  $\gamma$ -synuclein (green) at 6 dpi.** Eight-week-old female K18-hACE2 mice were intranasally infected with  $10^4$  PFU of SARS-CoV-2 ( $n = 3$ ). DAPI staining (blue) was used to visualise nuclei of ganglion cell layer (GCL), inner nuclear layer (INL), and outer nuclear layer (ONL) in the retinal cross section. Scale bar = 100  $\mu$ m. Data are representative of two independent experiments.

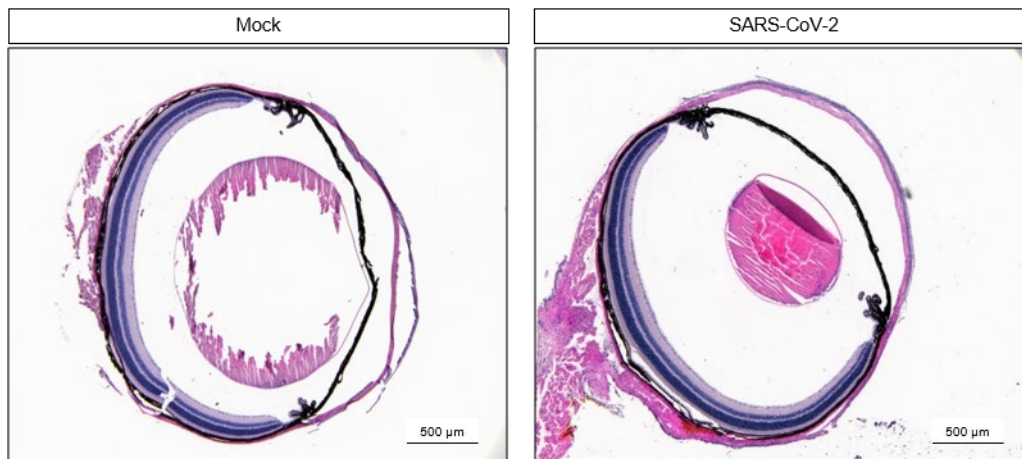

**Supplementary Fig. 4. Histopathological analysis of the eyes of SARS-Cov-2-infected mice.** H&E staining of the eyeball sections from K18-hACE2 mice ( $n = 4$  per group, total eight eyes) six days after mock infection or SARS-CoV-2 infection. Images are representative of total eight eyes. Scale bar = 500  $\mu\text{m}$ .

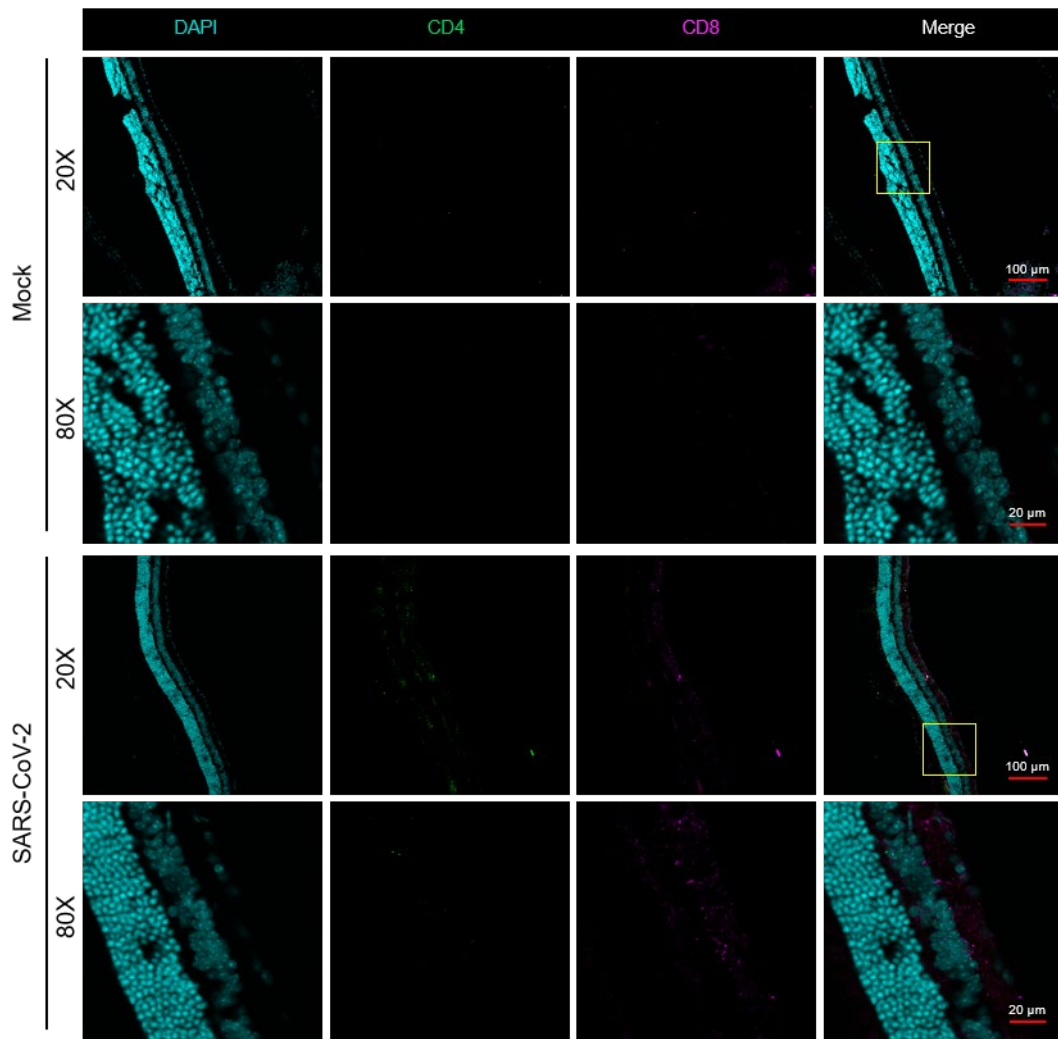

**Supplementary Fig. 5. Immunofluorescence staining of immune cells in the eyes of SARS-CoV-2-infected mice.** Six to seven-week-old K18-hACE2 mice were infected intranasally with  $10^4$  PFU SARS-CoV-2 ( $n = 10$ ) or mock infected with PBS ( $n = 8$ ). At 6 dpi, eye tissues were collected and processed for immunofluorescence staining. Cryosections were labelled for CD4 and CD8 T cells. Images were acquired using 20 $\times$  and 40 $\times$  (with 2 $\times$  zoom) objectives. Scale bars in panel = 100  $\mu\text{m}$  for 20 $\times$  objective; 20  $\mu\text{m}$  for 40 $\times$  (with 2 $\times$  zoom) objective. Data are representative of two independent experiments.

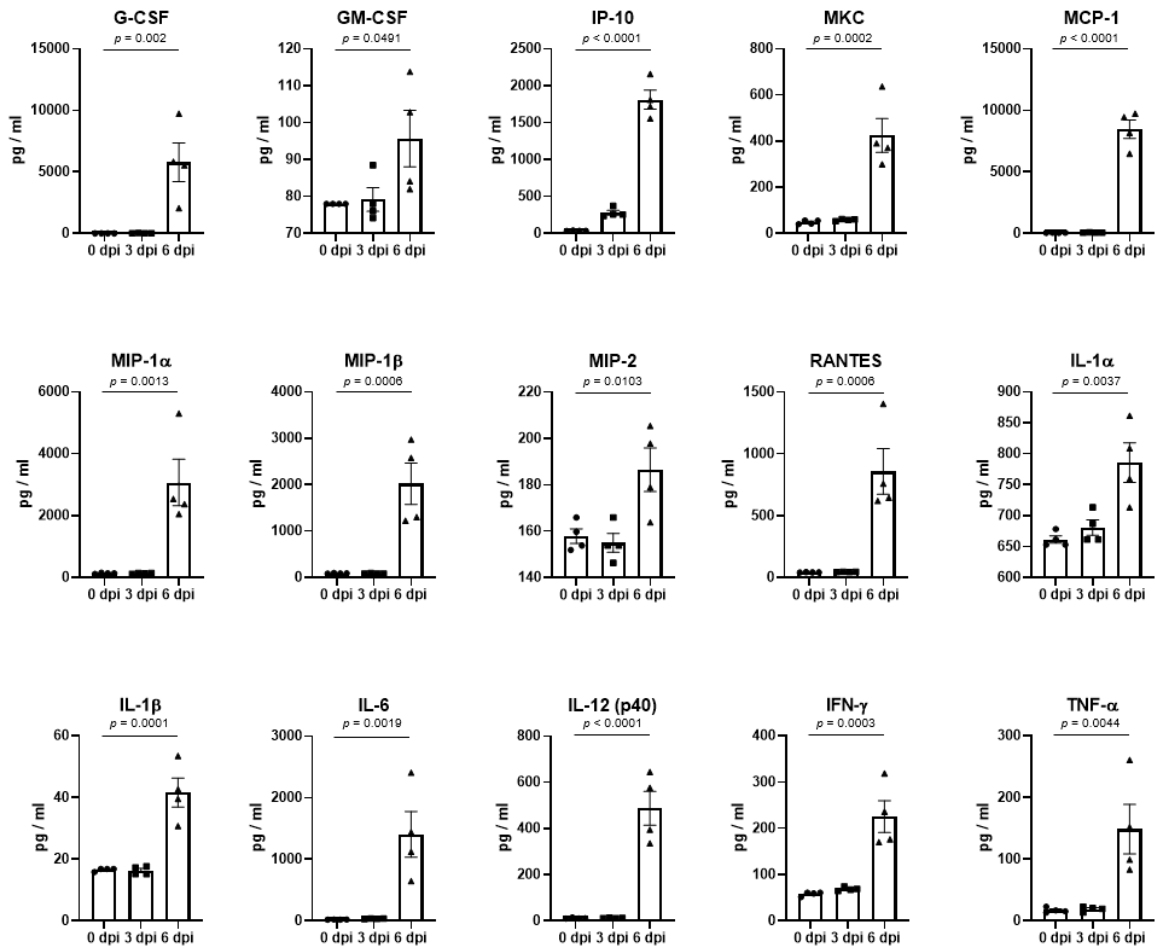

**Supplementary Fig. 6. Multiplex cytokine analysis of the brain tissues of SARS-CoV-2-infected mice.** The chemokine and cytokine levels of the brain were measured using multiplex immuno-analysis ( $n = 4$  per indicated dpi). G-CSF, granulocyte-macrophage colony-stimulating factor; IP-10, C-X-C motif chemokine 10 (CXCL10); MKC, mouse keratinocyte-derived chemokine; MCP-1, monocyte chemoattractant protein-1 (CCL2); MIP, macrophage-inflammatory protein; RANTES, regulated upon activation, normal T cell expressed and presumably secreted (CCL5); Symbols represent means  $\pm$  SEM. Statistically significant differences between the groups were determined using one-way ANOVA. SARS-CoV-2: severe acute respiratory syndrome coronavirus 2; dpi: days post-infection



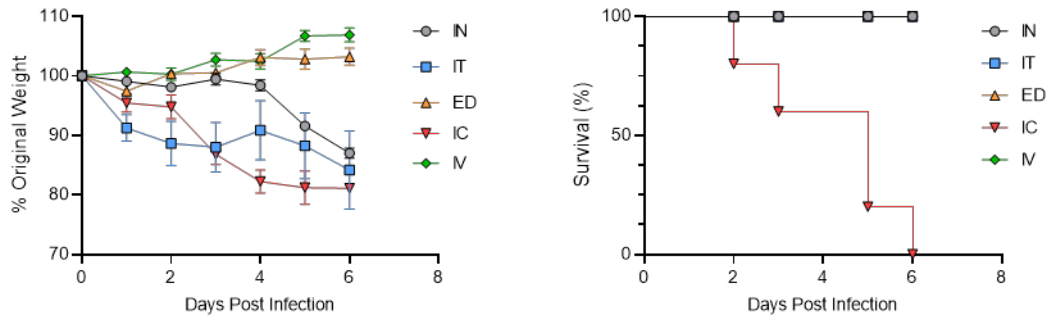

**Supplementary Fig. 7. Body weight and survival rate following SARS-CoV-2 infection via various routes.** K18-ACE2 mice were inoculated with  $10^4$  PFU SARS-CoV-2 via five different injection routes ( $n = 8$  per injection route). Body weight (left) and survival (right) were monitored at the indicated dpi. Symbols represent means  $\pm$  SEM. SARS-CoV-2: severe acute respiratory syndrome coronavirus 2; PFU: plaque-forming unit; dpi: days post-infection.

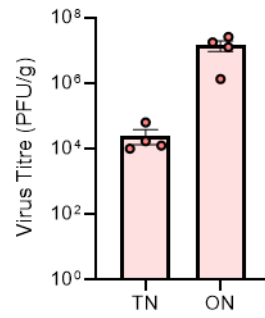

**Supplementary Fig. 8. Viral loads in the trigeminal nerves and optic nerves of SARS-CoV-2-infected mice.** Eight-week-old male K18-ACE2 mice were intranasally infected with 10<sup>4</sup> PFU of SARS-CoV-2 ( $n = 4$ ). The infectious virus titre was analysed using plaque assay at 6 dpi. Symbols represent means  $\pm$  SEM. TN: trigeminal nerves; ON: optic nerves.

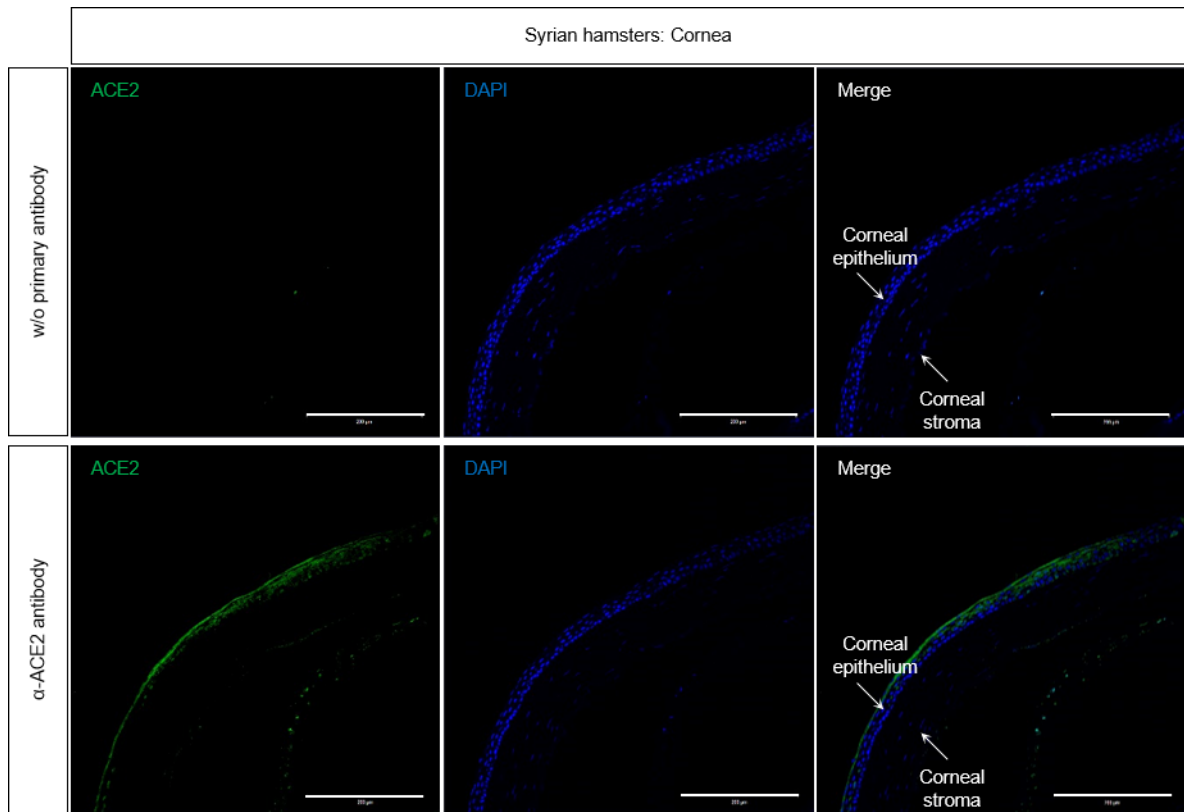

**Supplementary Fig. 9. Representative confocal images showing immunofluorescence staining for ACE2 in the eyes of Syrian hamsters.** Eye tissues of eleven-week-old female Syrian hamsters ( $n = 4$ ) were collected and processed for immunofluorescence staining. Eye sections were stained for ACE2 with (lower) or without (upper) anti-human ACE2 primary antibody. DAPI staining (blue) was used to visualize the nuclei. Scale bars in panel = 200  $\mu\text{m}$ .

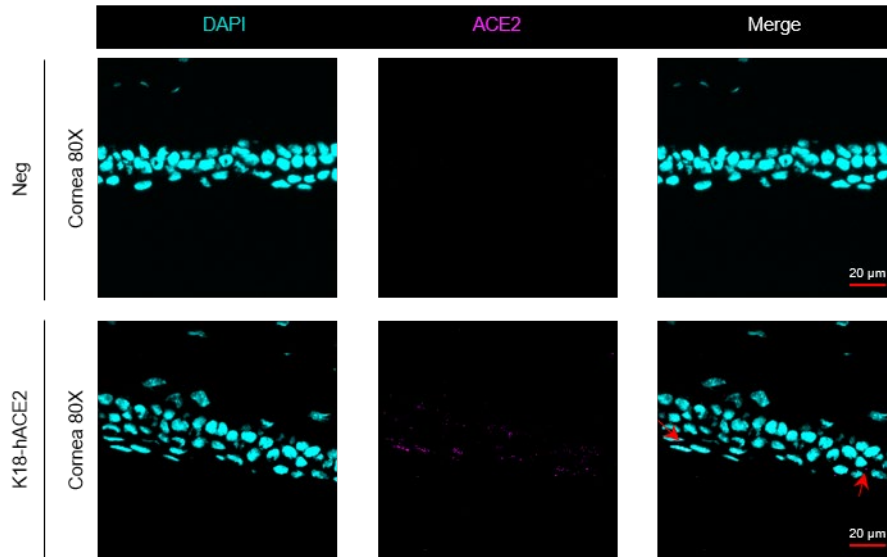

**Supplementary Fig. 10. Representative confocal images showing immunofluorescence staining for ACE2 in the eyes of K18-hACE2 mice.** Confocal microscopy of immunofluorescent staining of 10 $\mu$ m-cryosections of the eye of C57BL/6 (Neg) or K18-hACE2 mice. Images were acquired by confocal microscopy using a 40x (with 2x zoom) objective and are representative of n = 10. Scale bars in panel = 20  $\mu$ m for 40x (with 2x zoom) objective. Data representative of two independent experiments.

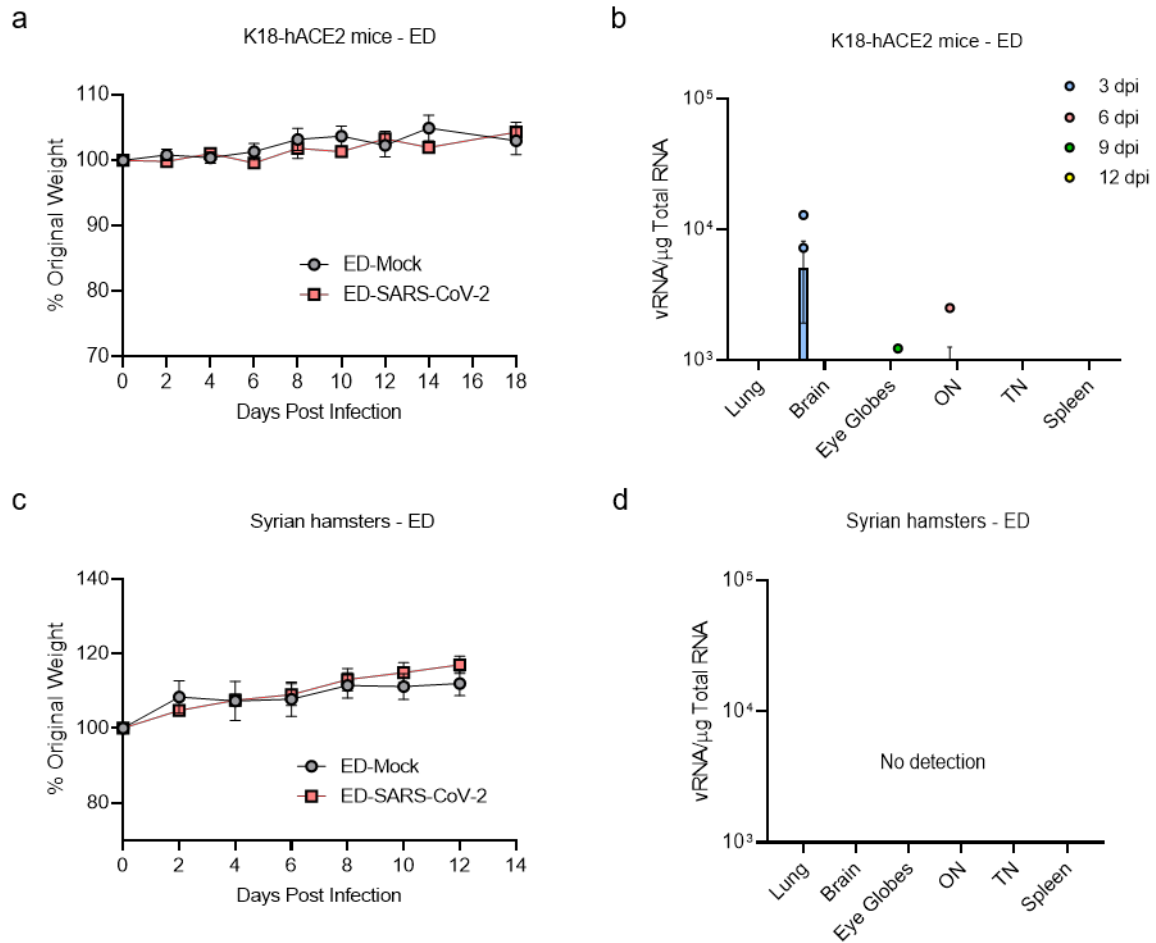

**Supplementary Fig. 11. Body weight and viral loads in the lungs, brain, eye globes, trigeminal nerve, and optic nerve of K18-hACE2 mice and Syrian hamsters following SARS-CoV-2 infection via eye drop.** K18-hACE2 mice ( $n = 16$ ;  $n = 4$  for 3, 6, 9, 12 dpi, respectively) and Syrian hamsters ( $n = 7$  for 12 dpi) were inoculated with  $10^4$  PFU SARS-CoV-2 via eye drop. **a, c** Body weights of both animals were monitored at the indicated dpi. **b, d** Viral RNA levels in the lungs, brain, eye globes, trigeminal nerve, and optic nerve of mice were analysed at 3, 6, 9, and 12 dpi using RT-qPCR (**b**; 3 dpi, blue; 6 dpi, red; 9 dpi, green; 12 dpi, yellow), and those of hamsters were analysed at 12 dpi (**d**). Viral RNA copies were cut-off at  $10^3$  copies/ $\mu\text{g}$ . Symbols represent means  $\pm$  SEM. SARS-CoV-2: severe acute respiratory syndrome coronavirus 2; PFU: plaque-forming unit; dpi: days post-infection
